# Supplementary material for: Singlet fission in pancake-bonded systems
Source: Royal Society of Chemistry journal article supplement (doi:10.1039/c6cp07641f), 2016-12-14
Supplement: c6cp07641f1.pdf [file c6cp07641f1.pdf]

## Supporting Information for

# “Singlet Fission in Pancake-Bonded Systems”

Soichi Ito,<sup>a</sup> Takanori Nagami,<sup>a</sup> and Masayoshi Nakano<sup>\*,a,b</sup>

<sup>a</sup> Department of Materials Engineering Science, Graduate School of Engineering Science, Osaka University, Toyonaka, Osaka 560-8531, Japan.

<sup>b</sup> Center for Spintronics Research Network (CSRN), Graduate School of Engineering Science, Osaka University, Toyonaka, Osaka 560-8531, Japan.

\*e-mail: [mnaka@cheng.es.osaka-u.ac.jp](mailto:mnaka@cheng.es.osaka-u.ac.jp)

Tel: +81-6-6850-6265

## Table of Contents

|        |                                                                                             |    |
|--------|---------------------------------------------------------------------------------------------|----|
| S-I.   | Electronic coupling matrix element along the other slip-stack axis for $\mathbf{1}_4$ ..... | S2 |
| S-II.  | FE and CT populations in eigenstates .....                                                  | S3 |
| S-III. | Comparison between exact eigenvalues and effective energies .....                           | S4 |

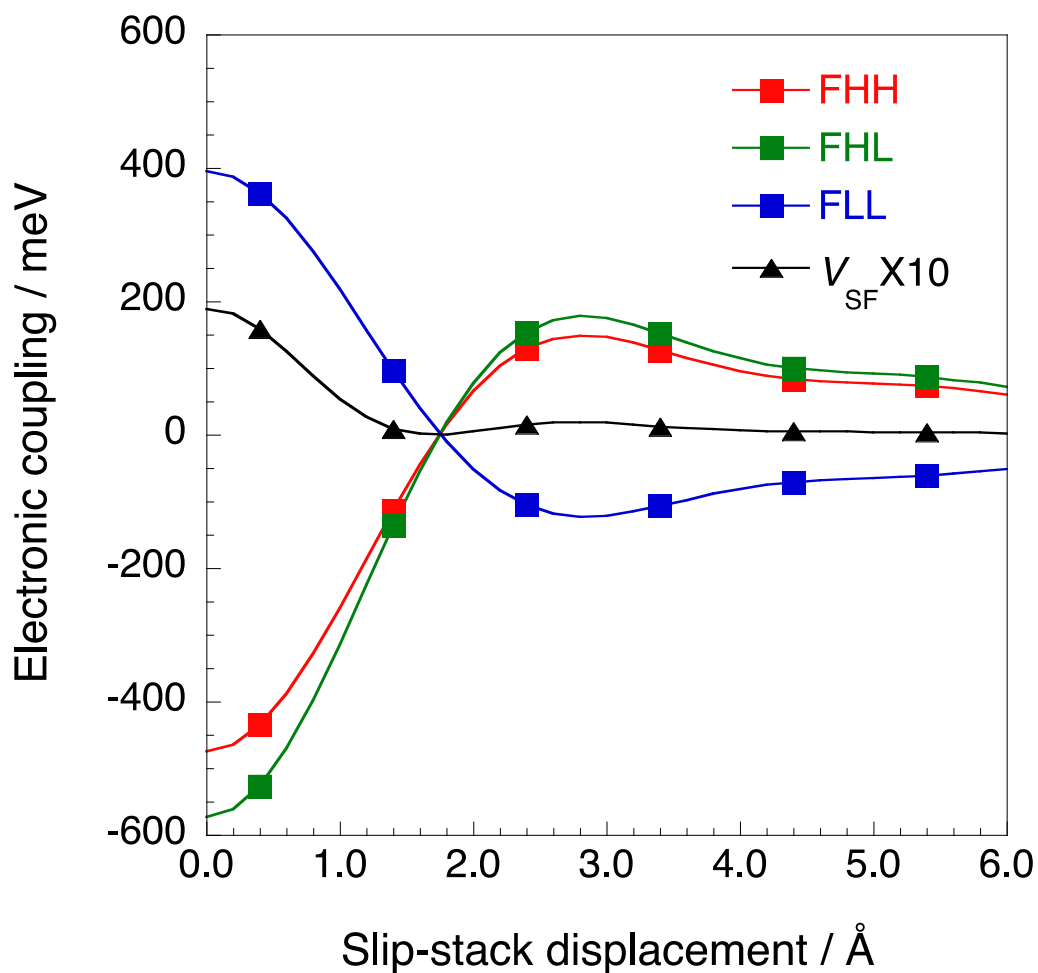

**Figure S1.** Fock matrix elements and SF coupling matrix element  $V_{SF}$  of  $\mathbf{1}_4$  along  $y$ -axis, which is perpendicular to the  $x$ -axis considered in the text and parallel to the  $\pi$ -plane. Intermonomer and interdimer distances,  $d$  and  $D$ , respectively, is set to 3.0 and 3.4 Å, respectively. Note that  $V_{SF}$  is multiplied by ten.

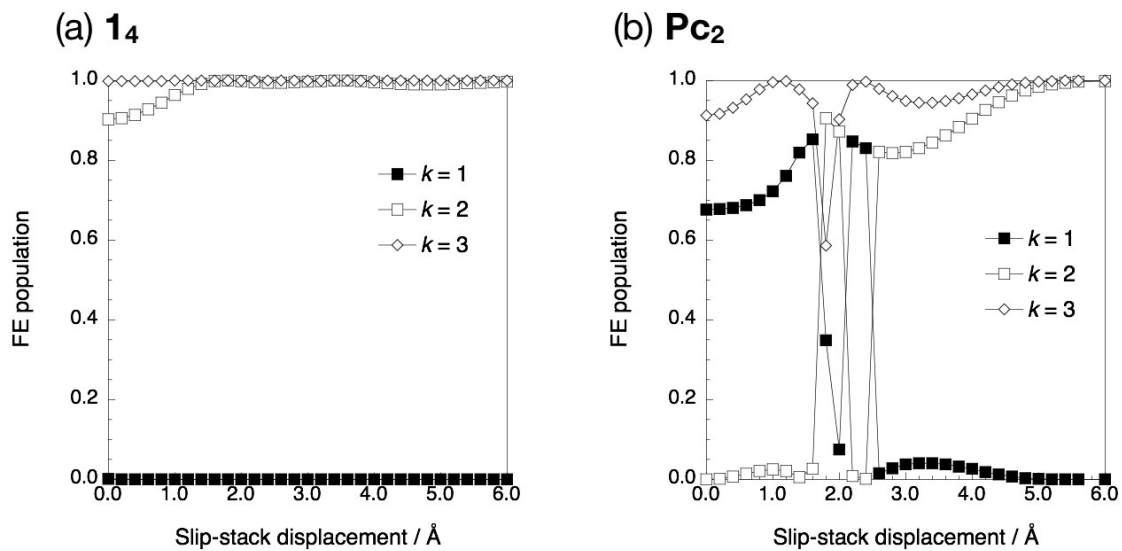

**Figure S2.** FE state population in low-lying eigenstates  $p(\text{FE}, k)$  for  $k = 1-3$  in  $\mathbf{1}_4$  (a) and  $\mathbf{Pc}_2$  (b).

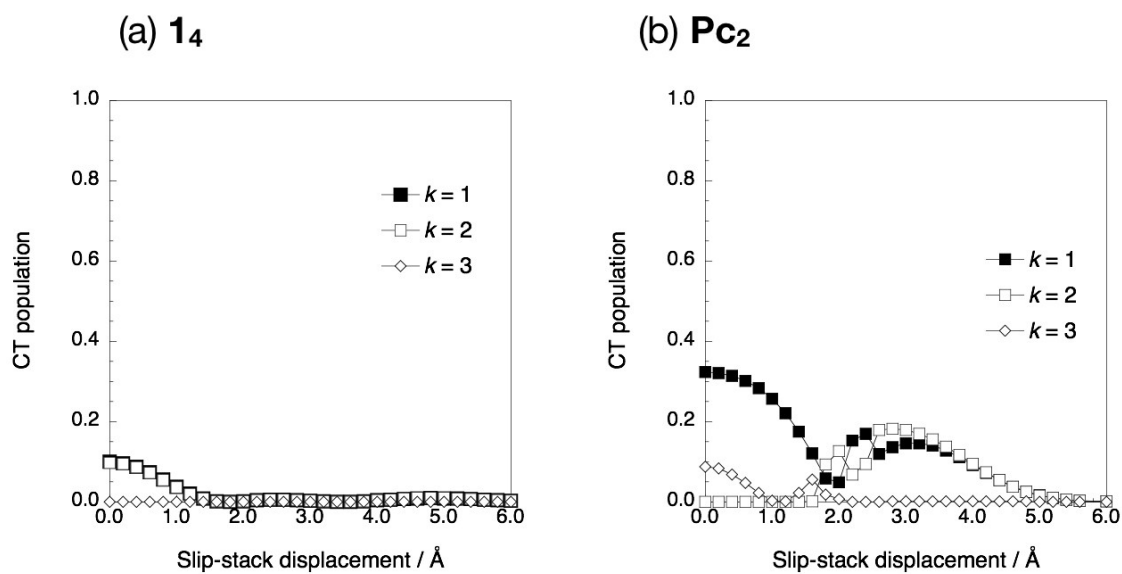

**Figure S3.** CT state population in low-lying eigenstates  $p(\text{CT}, k)$  for  $k = 1-3$  in  $\mathbf{1}_4$  (a) and  $\mathbf{Pc}_2$  (b).

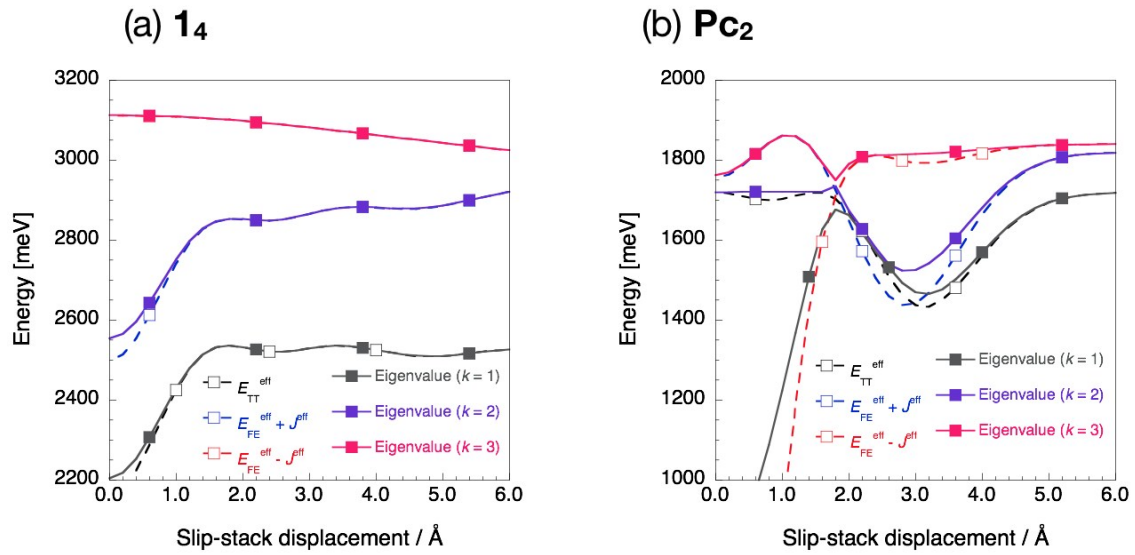

**Figure S4.** Comparison between the effective energies obtained from the effective Hamiltonian through the second-order quasi-degenerate perturbation theory and the eigenvalues obtained from full-diagonalization of eq 1 in the text for  $\mathbf{1}_4$  (a) and for  $\mathbf{Pc}_2$  (b). The effective energies are represented as broken lines with black for TT, blue and red for split FE states, respectively. The eigenvalues are represented as solid lines with gray for the lowest, purple for the second lowest and pink for the third lowest eigenstate, respectively.
